# Supplementary material for: Dynamic Interplay between the Periplasmic and Transmembrane Domains of GspL and GspM in the Type II Secretion System
Source: PLOS journal article supplement (doi:10.1371/journal.pone.0079562), 2013-11-01
Supplement: S3 (10.1371/journal.pone.0079562.s003) [file journal.pone.0079562.s003]

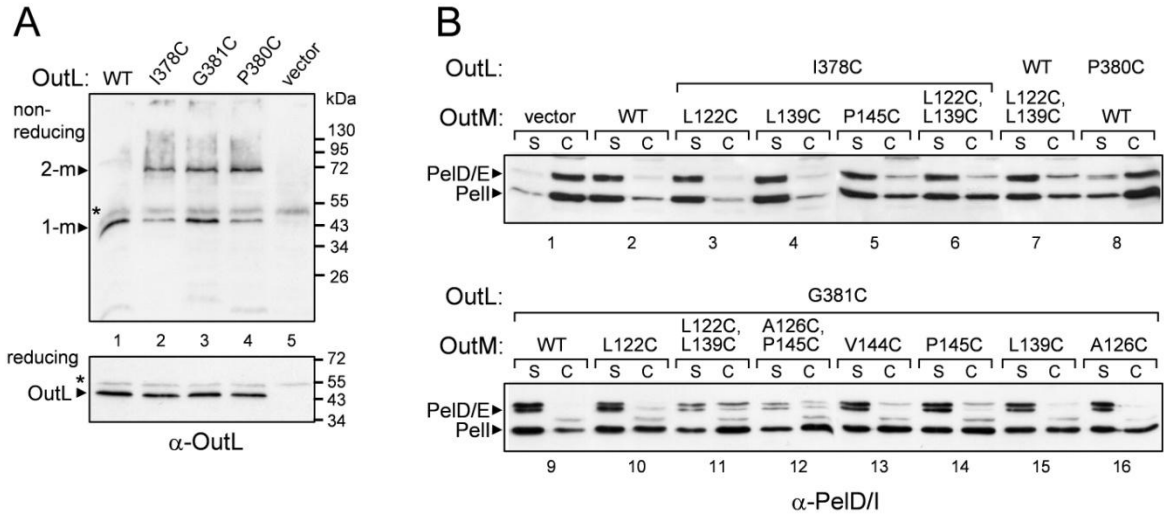

**Figure S2. Disulfide-bonding patterns and functionality of cysteine variants of OutL and OutM co-expressed in *D. dadantii* A5434 $\Delta$ outL.** (A), disulfide-bonding analysis of OutL/M variants. (B and C), secretion activity of OutL/M variants. *D. dadantii* A5434 $\Delta$ outL *pecS* cells, carrying a pTdB-oLoM plasmid co-expressing mutant *outL* and *outM* alleles (indicated on top), were grown, treated and analyzed with either GST-OutL antibodies (A), or PelD and PelI antibodies (B), as in Fig. 4. The positions of OutL monomers (1-m) and dimers (2-m) are indicated by arrowheads. Non-specific species interacting with GST-OutL antibodies are shown by asterisks. In (A), the amounts of formed dimers reflect the proximity of the respective residues from adjacent protomers. In (B), the quantity of secreted proteins present in the culture supernatant reflects the efficiency of secretion.
